# Supplementary material for: Virus-induced dysfunction of CD4+CD25+ T cells in patients with HTLV-I–associated neuroimmunological disease
Source: JCI journal article supplement (doi:10.1172/jci23913), 2005-05-02
Supplement: sd1 [file 1]

# Supplemental Figure 1

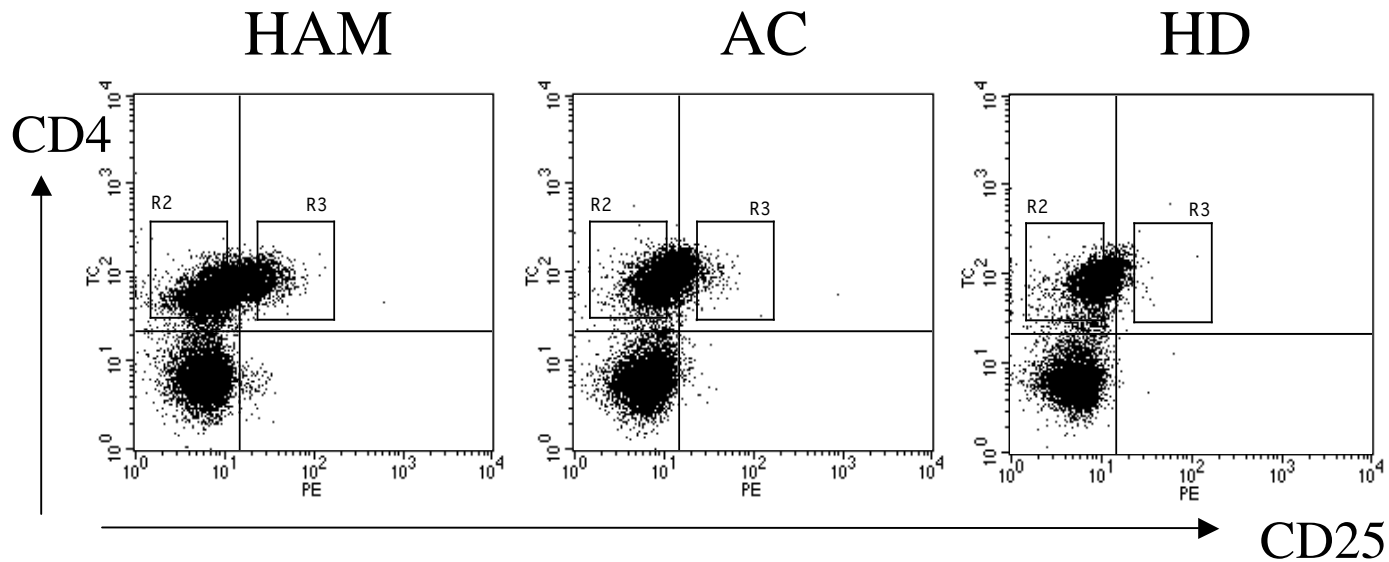

## Supplemental Figure 1

FACS profiles of CD4<sup>+</sup>CD25<sup>+/-</sup> T cell populations in patients and controls. The number of CD4<sup>+</sup>CD25<sup>+</sup> T cells was increased in HAM/TSP (19.52%) as compared to AC (5.3%), or HD (2.19%). The R2 gate defining the CD4<sup>+</sup>CD25<sup>-</sup> T cells and the R3 gate defining the CD4<sup>+</sup>CD25<sup>+</sup> for HAM/TSP and AC patients were selected based on the CD25<sup>negative</sup> and CD25<sup>high</sup> expression in healthy donors. The R2 and R3 gates were used for FACS sorting in Figures 1–4, and table 1. AC, asymptomatic HTLV-I infected individuals; HAM, HAM/TSP patients; HD; healthy donors.
